# Supplementary material for: Using HAADF-STEM for atomic-scale evaluation of incorporation of antibacterial Ag atoms in a β-tricalcium phosphate structure
Source: Royal Society of Chemistry journal article supplement (doi:10.1039/d0nr04208k), 2020-01-01
Supplement: d0nr04208k1.pdf [file d0nr04208k1.pdf]

# Using HAADF-STEM for atomic-scale evaluation of incorporation of antibacterial Ag atoms in a $\beta$ -tricalcium phosphate structure

Ozkan Gokcekaya<sup>1\*</sup>, Kyosuke Ueda<sup>2</sup>, Takayuki Narushima<sup>2</sup>, Takayoshi Nakano<sup>1</sup>

<sup>1</sup>Graduate School of Engineering, Osaka University, 2-1 Yamadaoka, Suita, Osaka,  
565-0871, Japan

<sup>2</sup>Department of Materials Processing, Tohoku University; 6-6-02 Aza Aoba,  
Aramaki, Aoba-ku; Sendai, Miyagi 980-8579, Japan

**Table S1** Notation and composition of the specimens used in this study.

| <b>Notation</b>     | <b>(Ca+Ag)/P atomic ratio</b> | <b>Ag/(Ca+Ag) atomic ratio</b> |
|---------------------|-------------------------------|--------------------------------|
| Pure $\beta$ -TCP   | 1.5                           | 0                              |
| 0.09Ag $\beta$ -TCP | 1.5                           | 0.091                          |
| 0.29Ag $\beta$ -TCP | 1.5                           | 0.291                          |

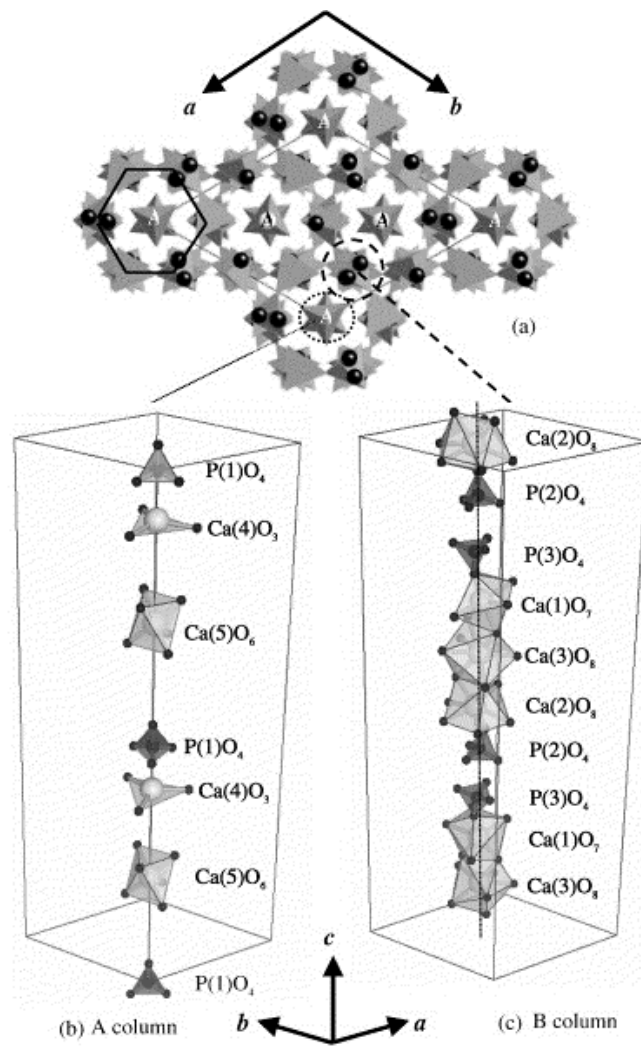

**Figure S1** Crystal structure of  $\beta$ -TCP. (a) hexagonal unit cell and (b)  $c$ -axis of A and B column.

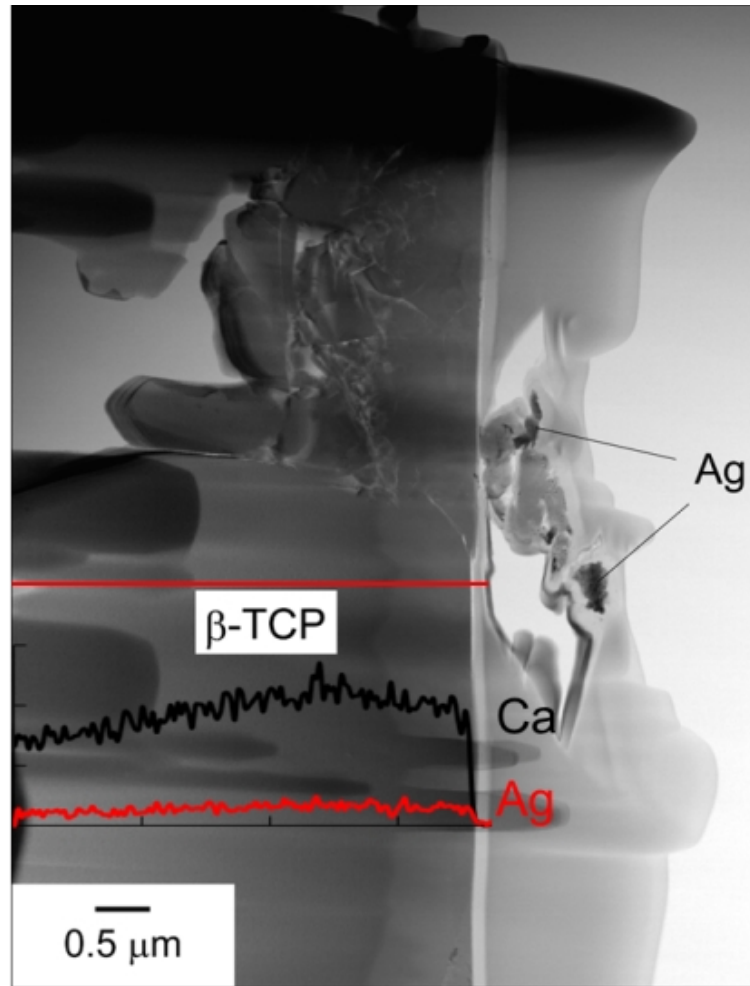

**Figure S2** TEM image and TEM-EDS line analysis of 0.29Agβ-TCP.

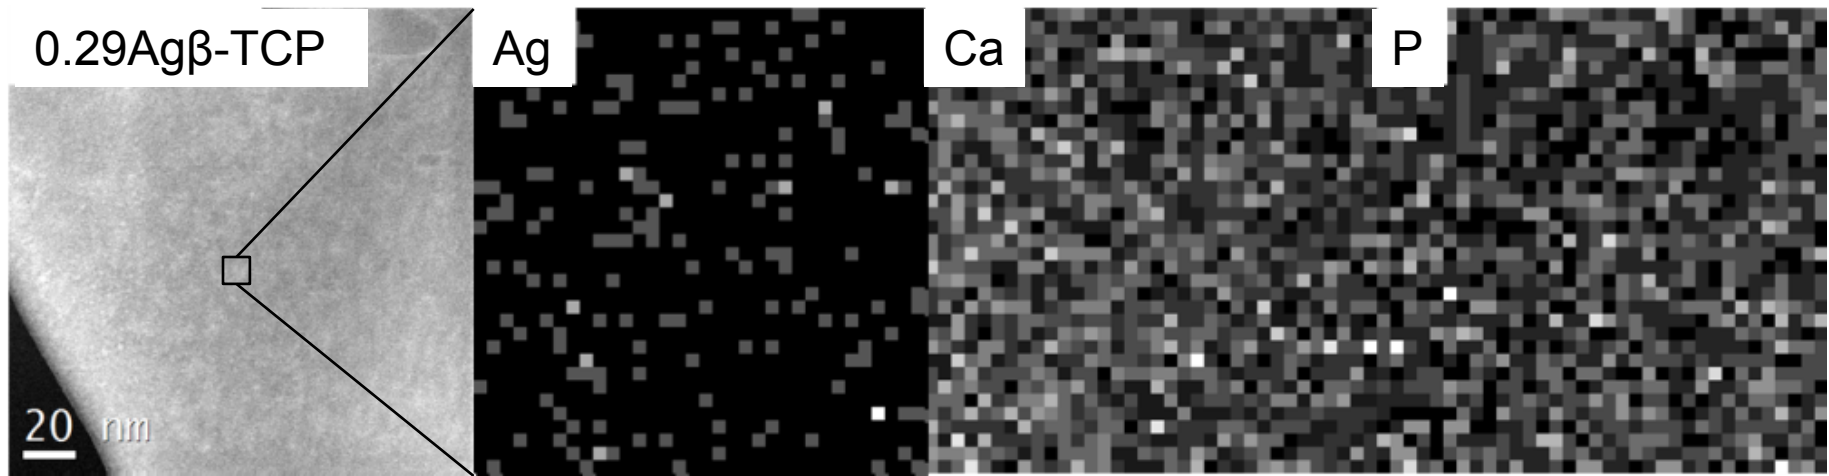

**Figure S3** TEM-EDS scanning of 0.29Agβ-TCP at 10 x 10 nm resolution.

(a) 0.29Ag $\beta$ -TCP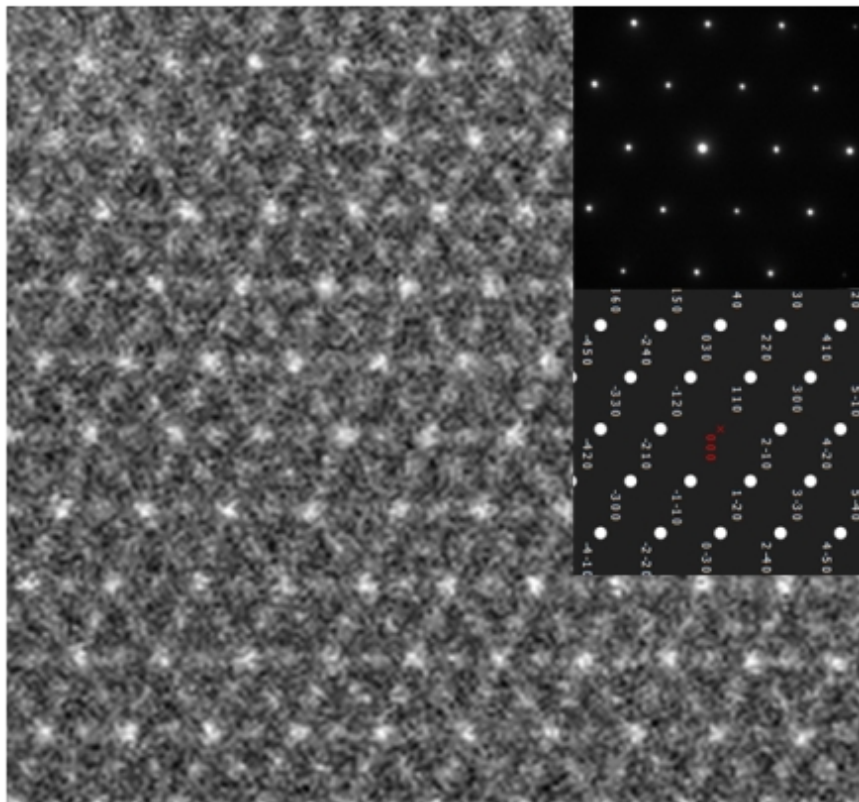(b) Pure  $\beta$ -TCP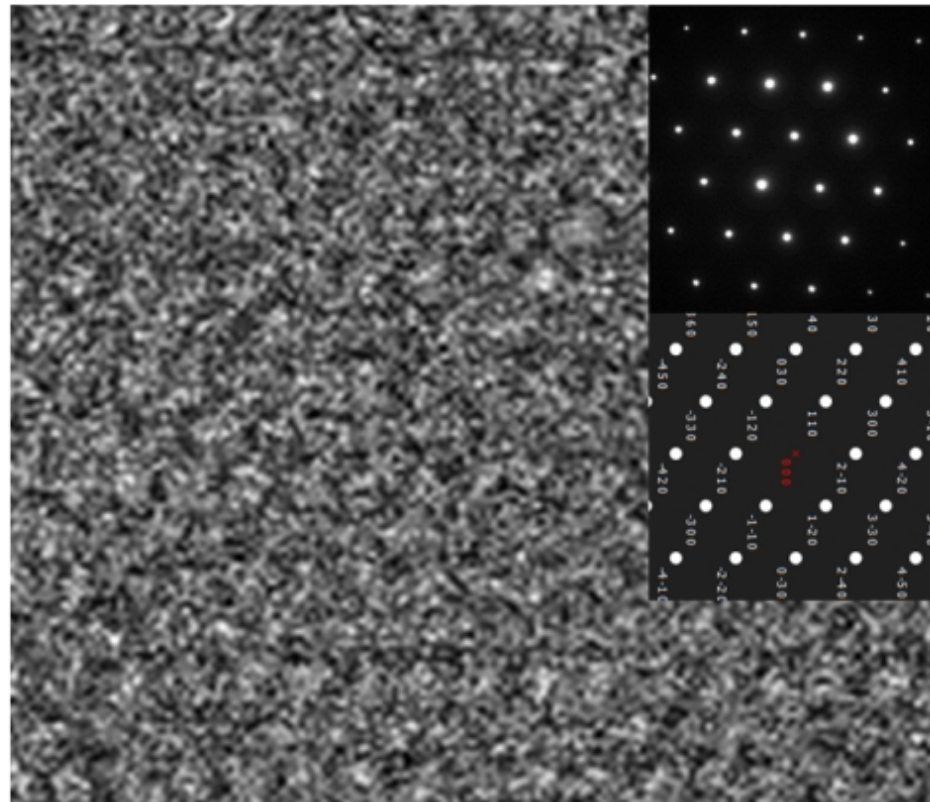

**Figure S4** Experimental HAADF-STEM image of (a) 0.29Ag $\beta$ -TCP and (b) pure  $\beta$ -TCP at [001] zone axis.

(a) 0.29Ag $\beta$ -TCP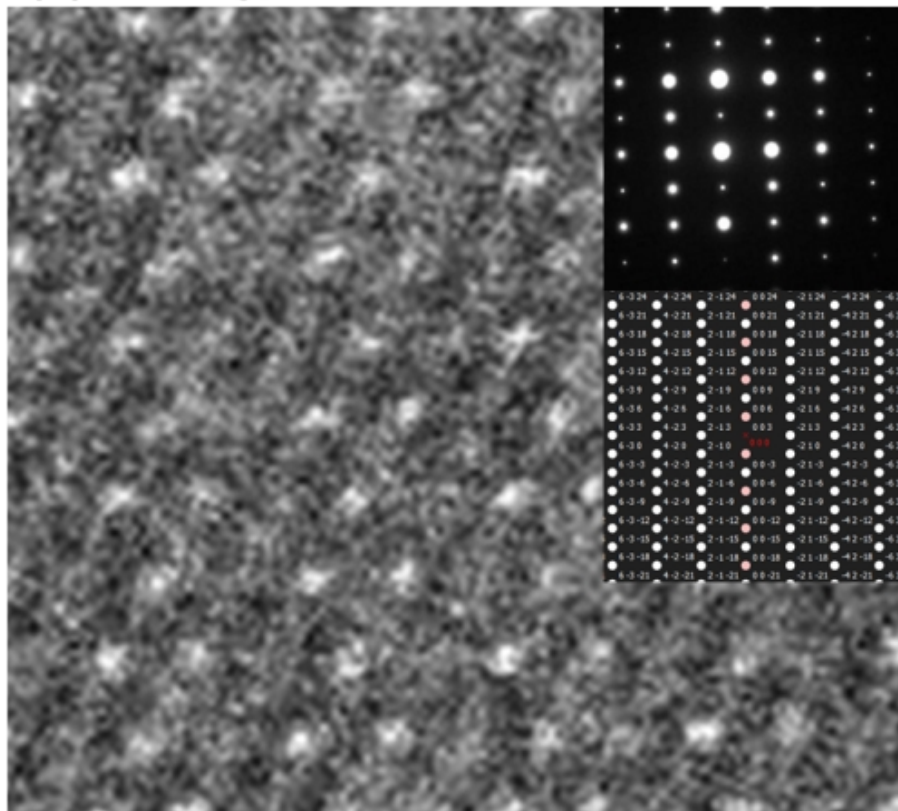(b) Pure  $\beta$ -TCP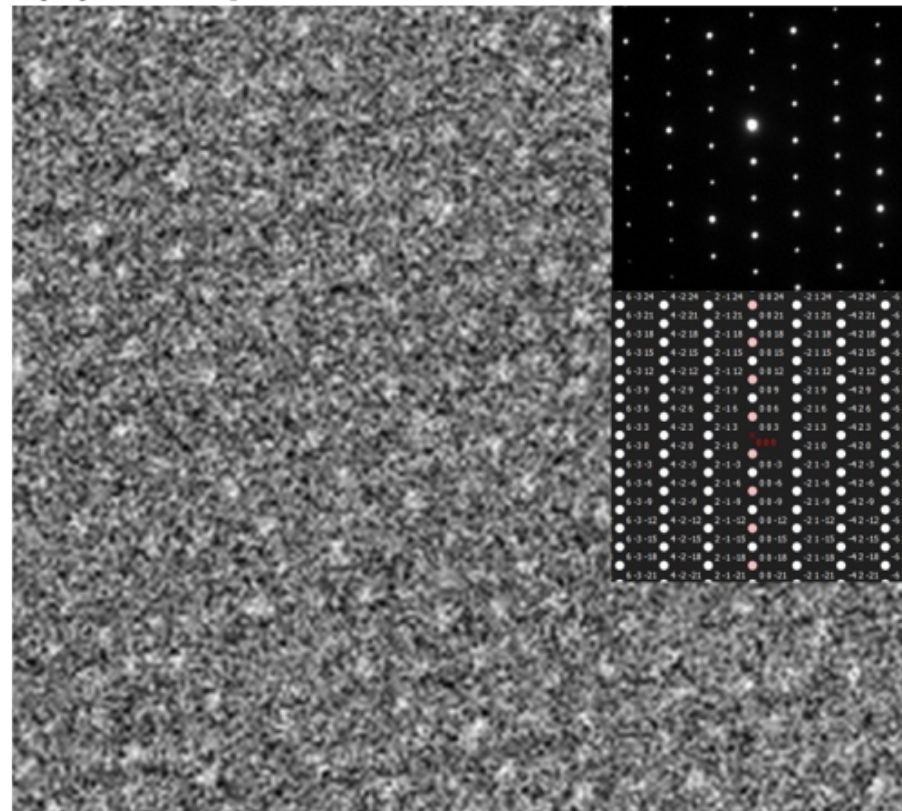

**Figure S5** Experimental HAADF-STEM image of (a) 0.29Ag $\beta$ -TCP and (b) pure  $\beta$ -TCP at [010] zone axis.
